# Supplementary material for: Associations between the stringency of COVID-19 containment policies and health service disruptions in 10 countries
Source: Springer Nature journal article supplement (doi:10.1186/s12913-023-09363-1), 2023-04-12
Supplement: MOESM1 [file 25233996]

**Associations between the stringency of COVID-19 containment policies and health service disruptions in 10 countries**  
**Reddy T, Kapoor NR, et al.**

**Supplemental materials**

**Supplemental Table 1. Health services by service type category in 10 countries**

| Service type                                        | Service                                   | CHL | ETH | GHA | HTI | KOR | KZN | LAO | MEX | NEP | THA |
|-----------------------------------------------------|-------------------------------------------|-----|-----|-----|-----|-----|-----|-----|-----|-----|-----|
| Service use overall and injuries                    | Outpatient visits                         |     | X   | X   | X   | X   | X   | X   | X   | X   | X   |
|                                                     | Inpatient admissions                      | X   | X   | X   |     | X   | X   | X   | X   | X   | X   |
|                                                     | Road traffic injuries                     | X   | X   | X   |     |     | X   | X   |     |     | X   |
|                                                     | Emergency room visits                     | X   | X   |     |     | X   |     |     | X   | X   |     |
|                                                     | Trauma admissions                         |     |     |     |     |     | X   |     |     |     |     |
|                                                     | Surgeries                                 | X   |     |     |     |     |     |     |     |     |     |
| Reproductive, maternal, and newborn health services | Deliveries                                | X   | X   | X   | X   | X   | X   | X   | X   | X   | X   |
|                                                     | Antenatal care visits                     | X   | X   | X   | X   | X   | X   | X   | X   | X   |     |
|                                                     | Caesarean sections                        | X   | X   | X   |     | X   | X   | X   | X   | X   |     |
|                                                     | Family planning visits                    | X   | X   | X   | X   |     |     | X   | X   | X   |     |
|                                                     | Postnatal care visits                     | X   | X   | X   | X   |     | X   | X   |     | X   |     |
| Child health services                               | Sick visits for malaria                   |     |     | X   |     |     |     |     |     |     | X   |
|                                                     | Sick visits for diarrhea                  |     | X   | X   |     | X   | X   |     | X   | X   |     |
|                                                     | Sick visits for pneumonia                 | X   | X   | X   |     | X   | X   |     | X   | X   |     |
|                                                     | Screened for malnutrition                 |     | X   |     |     |     |     |     | X   |     |     |
|                                                     | BCG vaccinations                          | X   | X   | X   |     |     | X   | X   | X   | X   |     |
|                                                     | Pentavalent vaccinations                  | X   | X   | X   |     |     | X   | X   | X   | X   |     |
|                                                     | Measles vaccinations                      | X   | X   | X   |     |     | X   |     | X   | X   |     |
|                                                     | Polio (3 <sup>rd</sup> dose) vaccinations |     | X   | X   |     |     |     | X   | X   | X   |     |
|                                                     | Pneumococcal vaccinations                 | X   | X   | X   |     |     | X   | X   | X   | X   |     |
|                                                     | Rotavirus vaccinations                    |     | X   | X   |     |     | X   |     | X   |     |     |
| Fully vaccinated by 1                               |                                           | X   | X   | X   |     | X   |     |     |     |     |     |

|                        |                                        |   |   |   |   |   |   |   |   |   |   |
|------------------------|----------------------------------------|---|---|---|---|---|---|---|---|---|---|
| Antiretroviral therapy | People on antiretroviral therapy (ART) |   | X |   |   | X | X |   | X |   |   |
| Chronic diseases       | Hypertension visits                    | X |   | X | X | X |   | X | X | X | X |
|                        | Diabetes visits                        | X |   | X | X | X | X | X | X | X | X |
|                        | Mental health care                     | X |   |   |   | X |   |   | X |   |   |
|                        | Cervical cancer screening              |   |   |   |   |   | X |   | X |   |   |
|                        | Breast cancer screening                | X |   |   |   |   |   |   | X |   |   |
|                        | TB screening                           |   |   |   |   |   | X |   |   |   |   |
|                        | TB case detection                      |   |   | X |   |   | X |   |   | X |   |
|                        | TB treatment                           |   |   |   |   |   | X |   |   |   |   |
| HIV tests              |                                        |   |   |   |   |   |   |   | X |   |   |

These are the services extracted from Health Management Information Systems (HMIS) for 10 countries, organized into service types. Countries are represented with International Organization for Standardization country codes

**Supplemental Table 2. Definition of containment policies and dichotomous recoding**

| <b>COVID-19 Restriction or Containment Policy</b> | <b>Definition</b>                           | <b>OxCGRT code</b>                                                                                                                                                  | <b>Dichotomous recoding (if applicable)</b> |
|---------------------------------------------------|---------------------------------------------|---------------------------------------------------------------------------------------------------------------------------------------------------------------------|---------------------------------------------|
| School closing                                    | Record closings of schools and universities | 0 - no measures                                                                                                                                                     | 0                                           |
|                                                   |                                             | 1 - recommend closing or all schools open with alterations resulting in significant differences compared to non-Covid-19 operations                                 | 0                                           |
|                                                   |                                             | <b>2 - require closing (only some levels or categories, eg just high school, or just public schools)</b>                                                            | <b>1</b>                                    |
|                                                   |                                             | <b>3 - require closing all levels</b>                                                                                                                               | <b>1</b>                                    |
| Workplace closing                                 | Record closings of workplaces               | 0 - no measures                                                                                                                                                     | 0                                           |
|                                                   |                                             | 1 - recommend closing (or recommend work from home) or all businesses open with alterations resulting in significant differences compared to non-Covid-19 operation | 0                                           |
|                                                   |                                             | <b>2 - require closing (or work from home) for some sectors or categories of workers</b>                                                                            | <b>1</b>                                    |
|                                                   |                                             | <b>3 - require closing (or work from home) for all-but-essential workplaces (eg grocery stores, doctors)</b>                                                        | <b>1</b>                                    |
| Cancel public events                              | Record cancelling public events             | 0 - no measures                                                                                                                                                     | 0                                           |
|                                                   |                                             | 1 - recommend cancelling                                                                                                                                            | 0                                           |
|                                                   |                                             | <b>2 - require cancelling</b>                                                                                                                                       | <b>1</b>                                    |

|                                   |                                                                       |                                                                                                                                             |          |
|-----------------------------------|-----------------------------------------------------------------------|---------------------------------------------------------------------------------------------------------------------------------------------|----------|
| Restrictions on gatherings        | Record limits on gatherings                                           | 0 - no restrictions                                                                                                                         | 0        |
|                                   |                                                                       | 1 - restrictions on very large gatherings (the limit is above 1000 people)                                                                  | 0        |
|                                   |                                                                       | <b>2 - restrictions on gatherings between 101-1000 people</b>                                                                               | <b>1</b> |
|                                   |                                                                       | <b>3 - restrictions on gatherings between 11-100 people</b>                                                                                 | <b>1</b> |
|                                   |                                                                       | <b>4 - restrictions on gatherings of 10 people or less</b>                                                                                  | <b>1</b> |
| Close public transport            | Record closing of public transport                                    | 0 - no measures                                                                                                                             | 0        |
|                                   |                                                                       | 1 - recommend closing (or significantly reduce volume/route/means of transport available)                                                   | 0        |
|                                   |                                                                       | <b>2 - require closing (or prohibit most citizens from using it)</b>                                                                        | <b>1</b> |
| Stay at home requirements         | Record orders to "shelter-in-place" and otherwise confine to the home | 0 - no measures                                                                                                                             | 0        |
|                                   |                                                                       | 1 - recommend not leaving house                                                                                                             | 0        |
|                                   |                                                                       | <b>2 - require not leaving house with exceptions for daily exercise, grocery shopping, and 'essential' trips</b>                            | <b>1</b> |
|                                   |                                                                       | <b>3 - require not leaving house with minimal exceptions (eg allowed to leave once a week, or only one person can leave at a time, etc)</b> | <b>1</b> |
| Restrictions on internal movement | Record restrictions on internal movement between cities/regions       | 0 - no measures                                                                                                                             | 0        |
|                                   |                                                                       | 1 - recommend not to travel between regions/cities                                                                                          | 0        |
|                                   |                                                                       | <b>2 - internal movement restrictions in place</b>                                                                                          | <b>1</b> |

|                               |                                                                                                                  |                                                         |          |
|-------------------------------|------------------------------------------------------------------------------------------------------------------|---------------------------------------------------------|----------|
| International travel controls | Record restrictions on international travel<br><br>Note: this records policy for foreign travelers, not citizens | 0 - no restrictions                                     | 0        |
|                               |                                                                                                                  | 1 - screening arrivals                                  | 0        |
|                               |                                                                                                                  | <b>2 - quarantine arrivals from some or all regions</b> | <b>1</b> |
|                               |                                                                                                                  | <b>3 - ban arrivals from some regions</b>               | <b>1</b> |
|                               |                                                                                                                  | <b>4 - ban on all regions or total border closure</b>   | <b>1</b> |
| State of Emergency            | State of emergency or state of disaster in place country-wide                                                    | -                                                       | -        |
| Curfew                        | Restrictions on the times that businesses could be open or that citizens could be outside country-wide           | -                                                       | -        |

Source: Oxford COVID-19 Government Response Tracker<sup>1</sup>

All policies were extracted from OxCGRT database except *State of Emergency* and *Curfew*, which were tracked by the research team as binary variables, whether the policy was in place or not. The OxCGRT policies were re-coded as binary variables for interpretability in the model. All OxCGRT policies, except *International Travel Restrictions*, included additional flag data that denoted if the policy was in place nationally at only one or many local levels. For the purposes of this analysis, all OxCGRT policies were only recorded if they were in place at the national level.

**Supplemental Table 3: Results from multi-level linear regression model for the association between the OxCGRT stringency index and relative service volumes (median stringency index)**

|                                                    | <i>Estimate (SE)</i> | <i>95% CI</i>  | <i>p-value</i> |
|----------------------------------------------------|----------------------|----------------|----------------|
| <b>Median Stringency index (per 10 percent)</b>    | -3.121 (0.226)       | -3.563;-2.678  | <0.001         |
| <b>Cases per million</b>                           | -0.001 (0.0007)      | -0.0026;0.0001 | 0.078          |
| <b>Service</b>                                     |                      |                |                |
| Reproductive, maternal and newborn health services | Reference            | N/A            | N/A            |
| Service use overall and injuries                   | -10.024 (2.524)      | -14.972;-5.077 | <0.001         |
| Child health services                              | -11.929 (3.663)      | -19.109;-4.749 | 0.001          |
| Antiretroviral therapy                             | 13.315 (9.045)       | -4.413;31.042  | 0.141          |
| Chronic disease services                           | -10.841 (6.072)      | -22.742;1.06   | 0.074          |
| <b>GDP (per 1000 unit)</b>                         | -0.584 (0.277)       | -1.127;-0.042  | 0.035          |
| <b>Variance estimates</b>                          |                      |                |                |
| Country-level random effects                       | 92.175 (46.909)      |                |                |
| Residual                                           | 442.708 (75.728)     |                |                |

This table represents the same model as the main model in the paper except the median stringency index in the month is used instead of the mean stringency index. Median stringency index ( $\beta_1$ ) is the median stringency index value for the month in each country, rescaled to a factor of 10. COVID-19 cases ( $\beta_2$ ) is the COVID-19 cases per million monthly in each country. Service type categories ( $\beta_3$ ) for service volume included: (1) reproductive, maternal, or newborn, (2) service use overall and injuries, (3) child health services, (4) antiretroviral therapy and (5) chronic diseases. GDP ( $\beta_4$ ) is GDP per capita, rescaled to a factor of 1000.

**Supplemental Table 4: Results from multi-level linear regression model for the association between the OxCGRT stringency index and relative service volumes (max stringency index)**

|                                                    | <b>Estimate (SE)</b> | <b>95% CI</b>  | <b>p-value</b> |
|----------------------------------------------------|----------------------|----------------|----------------|
| <b>Max Stringency index (per 10 percent)</b>       | -2.805 (0.309)       | -3.412;-2.199  | <0.001         |
| <b>Cases per million</b>                           | -0.001 (0.0007)      | -0.0025;0.0003 | 0.133          |
| <b>Service</b>                                     |                      |                |                |
| Reproductive, maternal and newborn health services | Reference            | N/A            | N/A            |
| Service use overall and injuries                   | -10.027 (2.521)      | -14.969;-5.086 | <0.001         |
| Child health services                              | -11.939 (3.66)       | -19.113;-4.766 | 0.001          |
| Antiretroviral therapy                             | 13.308 (9.048)       | -4.425;31.041  | 0.141          |
| Chronic disease services                           | -10.839 (6.073)      | -22.741;1.063  | 0.074          |
| <b>GDP (per 1000 unit)</b>                         | -0.569 (0.292)       | -1.142;0.004   | 0.052          |
| <b>Variance estimates</b>                          |                      |                |                |
| Country-level random effects                       |                      |                |                |
| Residual                                           | 98.267 (51.143)      |                |                |
|                                                    | 446.488 (75.381)     |                |                |

This table represents the same model as the main model in the paper except the maximum stringency index in the month is used instead of the mean stringency index. Max stringency index ( $\beta_1$ ) is the maximum stringency index value for the month in each country, rescaled to a factor of 10. COVID-19 cases ( $\beta_2$ ) is the COVID-19 cases per million monthly in each country. Service type categories ( $\beta_3$ ) for service volume included: (1) reproductive, maternal, or newborn, (2) service use overall and injuries, (3) child health services, (4) antiretroviral therapy and (5) chronic diseases. GDP ( $\beta_4$ ) is GDP per capita, rescaled to a factor of 1000.
